# Supplementary material for: Human CLASP2 specifically regulates microtubule catastrophe and rescue
Source: PubMed Central journal article supplement — Mol Biol Cell. 2018 May 15;29(10):1168–77. doi: 10.1091/mbc.E18-01-0016 (PMC5935067; doi:10.1091/mbc.e18-01-0016), 2018-05-15
Supplement: mbc-29-1168-s001.pdf [file mbc-29-1168-s001.pdf]

# Supplemental Materials

*Molecular Biology of the Cell*

Lawrence et al.

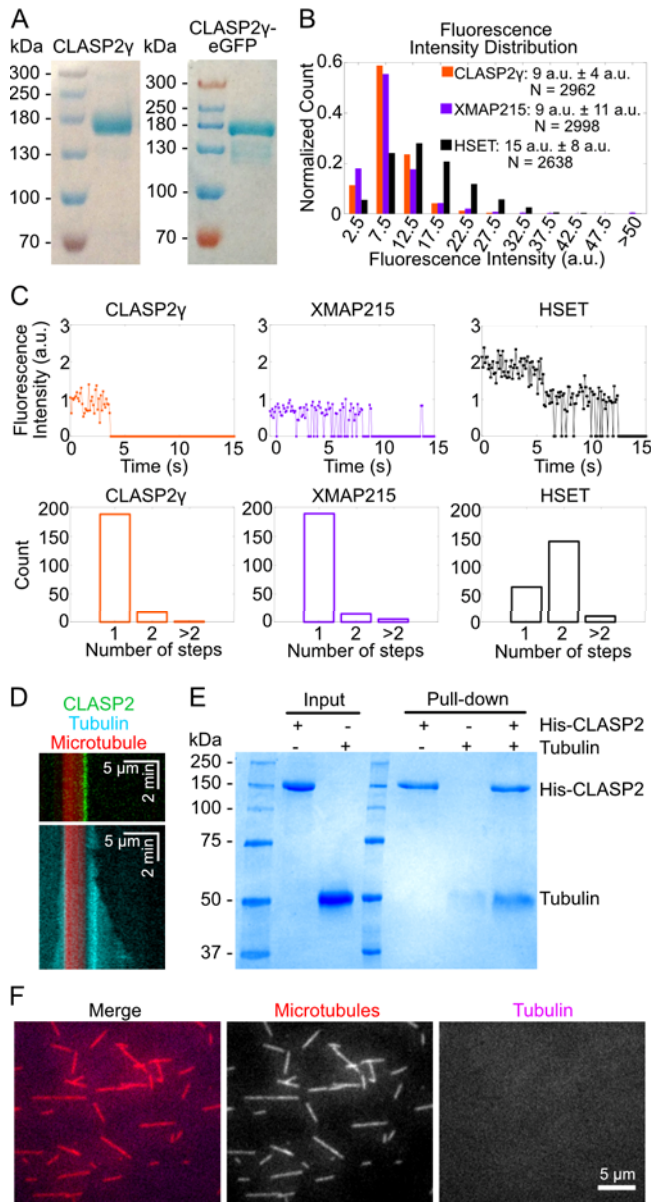

**Figure S1.** CLASP2 $\gamma$  is a monomer and binds to the plus-tips of GMPCPP-stabilized microtubules. (A) SDS-PAGE gels showing purified His-CLASP2 $\gamma$  proteins and His-CLASP2 $\gamma$ -eGFP-Strep. (B) First-frame fluorescence intensity distribution of CLASP2 $\gamma$ -eGFP, XMAP215-eGFP and eGFP-HSET at single molecule concentrations. Reported values are mean fluorescence intensities with standard deviations, N indicates the number of particles. (C) Example fluorescence intensity traces over time (top row) and stepwise photobleaching analysis (bottom row) of single molecules of CLASP2 $\gamma$ -eGFP, XMAP215-eGFP and eGFP-HSET. (D) A representative kymograph showing CLASP2 $\gamma$  recognizing one tip of a GMPCPP-stabilized microtubule. CLASP2 $\gamma$  binding preference was determined by assessing the microtubule polarity from the growth rate of microtubule extensions polymerized using 12  $\mu$ M Cy5-labeled tubulin (12  $\mu$ M). (E) Pull-down experiments to detect direct binding between His-CLASP2 $\gamma$  and soluble tubulin. (F) Representative fields of view of GMPCPP-stabilized microtubules incubated with 1  $\mu$ M Cy5-labeled soluble tubulin.

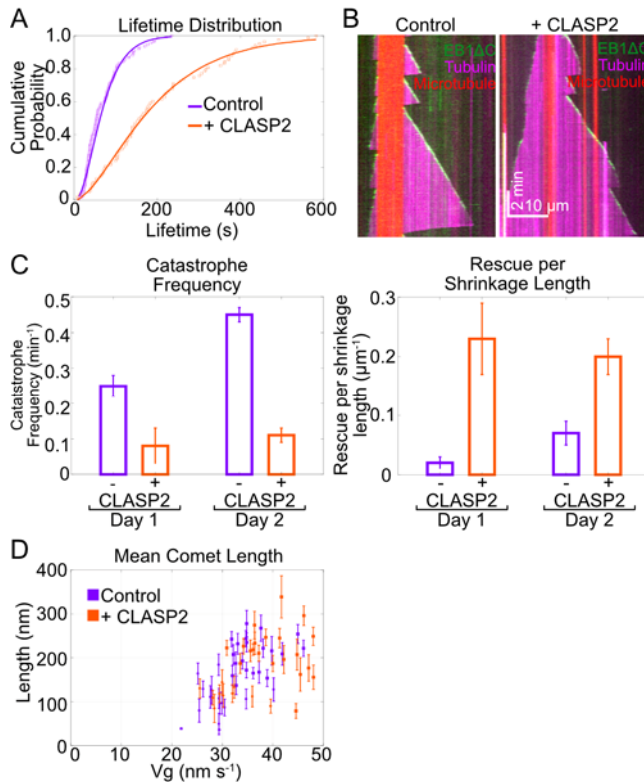

**Figure S2.** CLASP2 $\gamma$  suppresses catastrophe without increasing EB1 $\Delta$ C comets. (A) Cumulative distribution of lifetimes of microtubules grown with 10  $\mu$ M Cy5-labeled tubulin and 50 nM EB1 in the presence and absence of 12 nM CLASP2 $\gamma$ -eGFP. Lines are best fits to gamma distribution function (control: step = 2.5, 95%CI: [2.0, 3.2], rate = 0.035 s $^{-1}$ , 95%CI: [0.027 s $^{-1}$ , 0.046 s $^{-1}$ ], N=112; CLASP2: step = 1.9, 95%CI: [1.4, 2.5], rate = 0.009 s $^{-1}$ , 95%CI: [0.007 s $^{-1}$ , 0.013 s $^{-1}$ ], N=83). (B) Representative kymographs showing microtubules grown with 12  $\mu$ M Alexa 647-labeled tubulin and 200 nM EB1 $\Delta$ C-eGFP in the presence and absence of 1  $\mu$ M CLASP2 $\gamma$ . (C) Quantification of catastrophe frequency and rescue per shrinkage length of microtubules grown under the conditions described in B. Error bars represent SE. (D) Quantification of EB1 $\Delta$ C-eGFP comet decay length on microtubules grown with 12  $\mu$ M Alexa 647-labeled tubulin and 200 nM EB1 $\Delta$ C-eGFP with and without 1  $\mu$ M CLASP2 $\gamma$ . Data are means with 95% CI; circles and squares represent data from two independent experimental days. Mean comet length: 163 nm  $\pm$  11 nm for control (SE, N=35), and 182 nm  $\pm$  12 nm for CLASP2 $\gamma$  (SE, N=30); p=0.2, Welch's unpaired t-test.

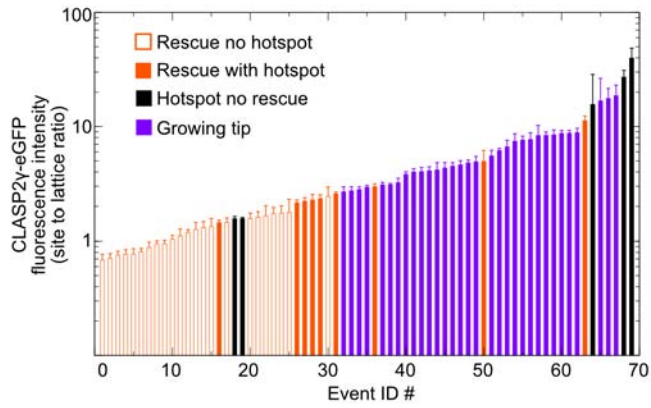

**Figure S3.** CLASP2 $\gamma$ -eGFP fluorescence intensity does not correlate with rescue. Site-to-lattice intensity ratio of CLASP2 $\gamma$ -eGFP fluorescence at 32 rescue sites (orange), 5 CLASP2 $\gamma$  hotspots without rescue (black) and 32 growing tips (purple). Solid orange bars (9 out of 32) indicate rescues that occurred at CLASP2 $\gamma$  hotspots (see Methods).
